# Supplementary material for: Electrode Size and Placement for Surface EMG Bipolar Detection from the Brachioradialis Muscle: A Scoping Review
Source: MDPI journal article supplement (doi:10.3390/s21217322), 2021-11-03
Supplement: s1 [file s1]

**Supplementary Table S1** – Complete list of all studies included in the current scoping review.

| Author, year         | Ref.  | Electrode Placement                          | Electrode or sEMG sensor diameter or size, mm | Electrode conductive area, mm <sup>2</sup> | Center to center inter-electrode distance, mm | Crosstalk assessed | Crosstalk mentioned | Application              | Subjects                 |
|----------------------|-------|----------------------------------------------|-----------------------------------------------|--------------------------------------------|-----------------------------------------------|--------------------|---------------------|--------------------------|--------------------------|
| Cavanagh 1979        | [79]  | na                                           | 10                                            | na                                         | na                                            |                    |                     | physiology               | healthy adults           |
| Matthews 1980        | [75]  | over muscle belly                            | 35                                            | na                                         | 35                                            |                    |                     | physiology               | healthy adults           |
| Matthews 1981        | [83]  | na                                           | na                                            | na                                         | na                                            |                    | yes                 | physiology               | healthy adults           |
| Tang 1981            | [24]  | over muscle belly                            | 10                                            | na                                         | 50                                            |                    |                     | pathophysiology          | patients with hemiplegia |
| Thepaut-mathieu 1985 | [93]  | na                                           | na                                            | na                                         | 10                                            |                    |                     | physiology               | healthy adults           |
| Pinzur 1988          | [85]  | na                                           | na                                            | na                                         | na                                            |                    |                     | clinic/surgical planning | patients with spasticity |
| Thepaut-mathieu 1988 | [93]  | na                                           | 4                                             | na                                         | 15                                            |                    |                     | physiology               | healthy adults           |
| Gamet 1989           | [64]  | over muscle belly                            | 5                                             | na                                         | 20                                            |                    |                     | physiology               | healthy adults           |
| Nagata 1990          | [37]  | over muscle belly                            | 4                                             | na                                         | 10                                            |                    |                     | physiology               | healthy adults           |
| Rouard 1990          | [48]  | over muscle belly                            | 11                                            | na                                         | na                                            |                    |                     | sport                    | healthy adults           |
| Bell 1992            | [57]  | over muscle belly                            | na                                            | na                                         | 30                                            |                    |                     | physiology               | healthy adults           |
| De serres 1992       | [32]  | over muscle belly                            | 4                                             | na                                         | 15                                            |                    |                     | physiology               | healthy adults           |
| Krogh-lund 1992      | [133] | distal to the motor point                    | na                                            | 18.5                                       | 15                                            |                    |                     | physiology               | healthy adults           |
| Petitjean1992        | [40]  | over muscle belly                            | 5                                             | na                                         | 20                                            |                    |                     | physiology               | healthy adults           |
| Caldwell 1993        | [141] | Figure provided                              | na                                            | 3.14                                       | 12                                            | yes                | yes                 | physiology               | healthy adults           |
| Jamison 1993         | [143] | Figure provided                              | na                                            | 3.14                                       | 12                                            |                    |                     | physiology               | healthy adults           |
| Krogh-lund 1993      | [132] | distal to the motor point                    | na                                            | 18.5                                       | 15                                            |                    |                     | physiology               | healthy adults           |
| Krogh-lund 1993      | [131] | distal to the motor point                    | na                                            | 18.5                                       | 15                                            |                    | yes                 | physiology               | healthy adults           |
| Nakazawa 1993        | [28]  | over muscle belly                            | 7                                             | na                                         | 20                                            |                    |                     | physiology               | healthy adults           |
| Bechtel 1994         | [65]  | over muscle belly                            | 2                                             | na                                         | 10                                            |                    |                     | physiology               | healthy adults           |
| Theeuwens 1994       | [90]  | na                                           | na                                            | na                                         | na                                            |                    | yes                 | physiology               | healthy adults           |
| Rouard 1995          | [69]  | over muscle belly                            | 11                                            | na                                         | 20                                            |                    | yes                 | sport                    | healthy adults           |
| Weeks 1996           | [154] | minimal crosstalk areas experimentally found | 1x10                                          | 10                                         | 10                                            | yes                | yes                 | physiology               | healthy adults           |

|                 |       |                                                                                                                       |           |     |     |     |                    |                                         |
|-----------------|-------|-----------------------------------------------------------------------------------------------------------------------|-----------|-----|-----|-----|--------------------|-----------------------------------------|
| Bilodeau 1997   | [52]  | over muscle belly                                                                                                     | 4         | na  | 6   |     | EMG methodology    | healthy adults                          |
| Tal'nov 1997    | [50]  | over muscle belly                                                                                                     | na        | na  | na  |     | modeling           | healthy adults                          |
| Kahn 1998       | [101] | na                                                                                                                    | na        | na  | na  |     | physiology         | healthy adults                          |
| Kasprisin 1998  | [38]  | over muscle belly                                                                                                     | na        | 50  | 20  |     | EMG methodology    | healthy adults                          |
| Tal'nov 1999    | [47]  | over muscle belly                                                                                                     | 7.5       | na  | 20  |     | physiology         | healthy adults                          |
| Guevel 2000     | [42]  | over muscle belly                                                                                                     | 4         | na  | 13  |     | physiology         | healthy adults                          |
| Kasprisin 2000  | [49]  | over muscle belly                                                                                                     | na        | 50  | 20  |     | physiology         | healthy adults                          |
| Siemionow 2000  | [56]  | over muscle belly                                                                                                     | na        | 50  | na  |     | physiology         | healthy adults                          |
| Yamamoto 2000   | [29]  | over muscle belly                                                                                                     | 7         | na  | 15  |     | physiology         | healthy adults                          |
| Levy 2001       | [102] | na                                                                                                                    | na        | na  | na  |     | physiology         | healthy adults                          |
| Mamaghani 2001  | [82]  | na                                                                                                                    | na        | na  | na  |     | physiology         | healthy adults                          |
| Ozawa 2001      | [144] | Figure provided                                                                                                       | <10       | na  | >30 |     | ergonomy           | healthy adults                          |
| Schmit 2001     | [45]  | over muscle belly                                                                                                     | na        | na  | na  |     | pathophysiology    | patients with stroke and brain injury   |
| Mamaghani 2002  | [81]  | na                                                                                                                    | na        | na  | na  |     | physiology         | healthy adults                          |
| O'Sullivan 2002 | [138] | Delagi & Perotto 1974                                                                                                 | na        | na  | 20  | yes | physiology         | healthy adults                          |
| Page 2003       | [139] | Delagi & Perotto 1974                                                                                                 | 12        | 113 | 20  |     | physiology/clinics | healthy adults and orthopaedic patients |
| Praagman 2003   | [86]  | na                                                                                                                    | na        | na  | 1.7 |     | physiology         | healthy adults                          |
| Seghers 2003    | [110] | SENIAM*                                                                                                               | 10        | na  | 20  |     | physiology         | healthy adults                          |
| Tarata 2003     | [89]  | na                                                                                                                    | 22,5x22,5 | 506 | 25  | yes | signal processing  | healthy adults                          |
| Todd 2003       | [61]  | over muscle belly                                                                                                     | 10        | na  | na  |     | physiology         | healthy adults                          |
| Mogk 2003       | [121] | one third of the distance from the proximal end of a line from the medial epicondyle to the distal head of the radius | 10        | 79  | 25  | yes | yes                | crosstalk assessment                    |
| Barry 2004      | [25]  | over muscle belly                                                                                                     | 8         | na  | 20  |     | physiology         | healthy adults                          |
| Hostens 2004    | [111] | SENIAM*                                                                                                               | 10        | na  | 20  |     | signal processing  | healthy adults                          |
| Schulte 2004    | [41]  | over muscle belly                                                                                                     | na        | 16  | 20  |     | physiology         | healthy adults                          |

|                  |       |                                              |                |      |               |     |     |                      |                                     |
|------------------|-------|----------------------------------------------|----------------|------|---------------|-----|-----|----------------------|-------------------------------------|
| Barry 2005       | [51]  | over muscle belly                            | na             | na   | 13            |     |     | physiology           | healthy adults                      |
| Cui 2005         | [80]  | na                                           | na             | na   | na            |     |     | signal processing    | healthy adults                      |
| Ervilha 2005     | [122] | 5 cm distally from elbow joint               | na             | na   | 20            |     |     | physiology           | healthy adults                      |
| Jaskolska 2006   | [35]  | over muscle belly                            | 4              | na   | 25            |     | yes | physiology           | healthy adults                      |
| Linnamo 2006     | [134] | distal to the motor point                    | 4              | na   | 20            |     |     | physiology           | healthy adults                      |
| Søgaard 2006     | [62]  | over muscle belly                            | 10             | na   | na            |     |     | physiology           | healthy adults                      |
| Neto 2007        | [112] | SENIAM*                                      | 10x2           | 20   | 20            |     |     | sport                | healthy adults                      |
| Smith 2007       | [59]  | over muscle belly                            | 10             | na   | na            |     |     | physiology           | healthy adults                      |
| Calder 2008      | [130] | over motor point                             | 10x30          | na   | 20            |     |     | physiology           | healthy adults                      |
| Chang 2008       | [60]  | over muscle belly                            | 10             | na   | na            | yes | yes | signal processing    | healthy adults                      |
| Doheny 2008      | [113] | SENIAM*                                      | 1x10           | 10   | 10            |     |     | physiology           | healthy adults                      |
| Iwamuro 2008     | [100] | na                                           | na             | na   | na            |     |     | clinics              | patients with stroke                |
| Mayer 2008       | [124] | 4 cm distal to the elbow crease              | na             | na   | na            |     | yes | clinics              | patients with acquired brain injury |
| Rudroff 2008     | [148] | between innervation zone and terminal tendon | 8              | na   | 20            |     | yes | physiology           | healthy adults                      |
| Bonnefoy 2009    | [114] | SENIAM*                                      | 40             | na   | 25            |     |     | physiology           | healthy adults                      |
| Hug 2009         | [71]  | over muscle belly                            | 10x1           | 10   | 10            |     |     | physiology           | healthy adults                      |
| Li 2009          | [151] | Cram 1998                                    | na             | na   | 20            |     | yes | modeling             | healthy adults                      |
| Oliveira 2009    | [126] | 5 cm distally from elbow joint               | 30             | 78.5 | 20            |     |     | physiology           | healthy adults                      |
| Oliveira 2009    | [125] | 5 cm distally from elbow joint               | 30             | 78.5 | 20            |     |     | physiology           | healthy adults                      |
| Staudenmann 2009 | [127] | 2 cm distal to the elbow joint               | 8              | na   | 20            |     | yes | physiology           | healthy adults                      |
| Merlo 2009       | [153] | Basmajian 1983                               | from 2.5 to 18 | na   | from 10 to 50 | yes | yes | crosstalk assessment | healthy adults                      |
| Lopez 2010       | [6]   | SENIAM*                                      | na             | na   | na            |     |     | signal processing    | healthy adults                      |
| Mountjoy 2010    | [70]  | over muscle belly                            | na             | na   | na            | yes | yes | modelling            | healthy adults                      |
| Gerzevic 2011    | [115] | SENIAM*                                      | 9              | na   | 20            |     |     | sport                | healthy adults                      |
| Hawkes 2011      | [97]  | na                                           | na             | 78.5 | 20            |     | yes | physiology           | healthy adults                      |
| Booghs 2012      | [46]  | over muscle belly                            | 8              | na   | na            |     |     | physiology           | healthy adults                      |

|                  |       |                                                                        |      |    |    |     |                   |                                |
|------------------|-------|------------------------------------------------------------------------|------|----|----|-----|-------------------|--------------------------------|
| Butler 2012      | [53]  | over muscle belly                                                      | na   | na | 40 |     | physiology        | healthy adults                 |
| Hashemi 2012     | [116] | SENIAM*                                                                | 4    | na | 15 |     | modeling          | healthy adults                 |
| Holmes 2012      | [149] | between innervation zone and terminal tendon                           | na   | na | 25 |     | physiology        | healthy adults                 |
| James 2012       | [55]  | over muscle belly                                                      | na   | na | na |     | physiology        | healthy adults                 |
| Serrau 2012      | [87]  | na                                                                     | na   | na | 20 |     | sport             | healthy adults                 |
| Santhome 2012    | [117] | SENIAM*                                                                | 36   | 78 | 36 |     | physiology        | healthy adults                 |
| Uzun 2012        | [150] | halfway from the motor point area to the distal insertion              | na   | na | 20 | yes | pathophysiology   | adults with spinal cord injury |
| Baudry 2013      | [33]  | over muscle belly                                                      | 8    | na | 20 |     | physiology        | healthy adults                 |
| Caldirola 2013   | [68]  | over muscle belly                                                      | 10   | na | 10 |     | ergonomy          | healthy adults                 |
| Kang 2013        | [63]  | over muscle belly                                                      | 25   | na | 20 |     | physiology        | healthy adults                 |
| Lamprou 2013     | [152] | Cram 1998                                                              | na   | na | na |     | physiology        | healthy adults                 |
| Semmler 2013     | [31]  | over muscle belly                                                      | 4    | na | 20 |     | physiology        | healthy adults                 |
| Yoon 2013        | [104] | SENIAM*                                                                | 8    | na | 16 |     | physiology        | healthy adults                 |
| Chalmers 2014    | [44]  | over muscle belly                                                      | na   | na | na |     | physiology        | healthy adults                 |
| Grant 2014       | [58]  | over muscle belly                                                      | na   | na | 25 | yes | sport             | healthy adults                 |
| Harwood 2014     | [91]  | na                                                                     | na   | na | 20 |     | physiology        | healthy adults                 |
| Hong 2014        | [98]  | na                                                                     | na   | na | na |     | sport             | healthy adults                 |
| McCormick 2014   | [73]  | over muscle belly                                                      | na   | na | 25 | yes | sport             | healthy adults                 |
| Onety 2014       | [36]  | over muscle belly                                                      | 10x1 | 10 | 10 |     | ergonomy          | healthy adults                 |
| Rong 2014        | [140] | Delagi & Perotto 1974                                                  | na   | na | 50 |     | signal processing | healthy adults                 |
| Thiebaud 2014    | [128] | at 20% of the distance between the fossa cubit and radial carpal joint | na   | na | na |     | physiology        | healthy adults                 |
| Carius 2015      | [8]   | SENIAM*                                                                | 15   | 95 | 20 | yes | EMG methodology   | healthy adults                 |
| Hiscock 2015     | [137] | Delagi & Perotto 1974                                                  | 34   | na | 30 |     | sport             | healthy adults                 |
| Rendos 2015      | [135] | proximal to the motor point                                            | na   | na | na | yes | sport             | healthy adults                 |
| Sonne 2015       | [74]  | Over muscle belly                                                      | na   | na | na |     | physiology        | healthy adults                 |
| Staudenmann 2015 | [2]   | Figure provided                                                        | 2    | na | 10 | yes | yes               | EMG methodology healthy adults |

|                |       |                                                                                                     |      |      |    |     |                       |                      |
|----------------|-------|-----------------------------------------------------------------------------------------------------|------|------|----|-----|-----------------------|----------------------|
| Vonwerder 2015 | [129] | one third from the fossa cubit along the palpable muscle belly                                      | na   | na   | 20 | yes | physiology            | healthy adults       |
| Z'graggen 2015 | [120] | 25% of the distance from the lateral epicondyle of the humerus to the styloid process of the radius | 8    | na   | na |     | physiology            | healthy adults       |
| Dickie 2016    | [119] | 3 cm lateral 4 cm below the antecubital fossa                                                       | na   | na   | 20 |     | physiology            | healthy adults       |
| Gaudet 2016    | [136] | Delagi & Perotto 1974                                                                               | 10   | na   | 24 | yes | EMG methodology       | healthy adults       |
| Hill 2016      | [145] | Barbero 2012                                                                                        | 4    | na   | 30 |     | physiology            | healty adults        |
| Padulo 2016    | [105] | SENIAM*                                                                                             | na   | na   | 50 |     | physiology            | healthy adults       |
| Penzer 2016    | [84]  | na                                                                                                  | 8    | na   | 20 |     | physiology            | healthy adults       |
| Turpin 2016    | [67]  | over muscle belly                                                                                   | 10x1 | 10   | 10 |     | physiology            | healthy adults       |
| Vonwerder 2016 | [106] | SENIAM*                                                                                             | na   | na   | 20 | yes | physiology            | healthy adults       |
| Baadjou 2017   | [118] | at one-fourth of the distance between the elbow crease and processus styloideus radii               | 10x1 | 10   | 10 |     | ergonomy              | healthy adults       |
| Issa 2017      | [99]  | na                                                                                                  | na   | na   | 30 |     | physiology/diagnostic | patients with ALS    |
| Ranavolo 2017  | [146] | Barbero 2012                                                                                        | 10   | na   | 20 |     | ergonomy              | healthy adults       |
| Sarcher 2017   | [107] | SENIAM*                                                                                             | 10   | na   | na | yes | physiology/clinics    | children with CP     |
| Zhang 2017     | [95]  | na                                                                                                  | 10x1 | 10   | 10 |     | ergonomy              | healthy adults       |
| Caufriez 2018  | [66]  | over muscle belly                                                                                   | na   | na   | 20 | yes | physiology            | healthy adults       |
| Hill 2018      | [147] | Barbero 2012                                                                                        | 4    | na   | 30 |     | physiology            | healthy adults       |
| Liu 2018       | [30]  | over muscle belly                                                                                   | 10x1 | 10   | 10 |     | physiology            | patients with stroke |
| Myers 2018     | [78]  | over muscle belly                                                                                   | 10x1 | 10   | 10 |     | physiology            | healthy adults       |
| Myers 2018     | [26]  | over muscle belly                                                                                   | 10x1 | 10   | 10 |     | physiology            | healthy adults       |
| Sarcher 2018   | [54]  | over muscle belly                                                                                   | 21   | 78.5 | 22 |     | EMG methodology       | children with CP     |
| Sommer 2018    | [34]  | over muscle belly                                                                                   | 4    | na   | 20 |     | signal processing     | healthy adults       |

|                     |       |                                  |      |     |    |                       |                                             |
|---------------------|-------|----------------------------------|------|-----|----|-----------------------|---------------------------------------------|
| Zeng 2018           | [94]  | na                               | 10x1 | 10  | 10 | signal processing     | healthy adults                              |
| Zhang 2018          | [27]  | over muscle belly                | 10x1 | 10  | 10 | signal processing     | healthy adults                              |
| Marcolin 2018       | [108] | SENIAM*                          | na   | na  | 24 | sport                 | healthy adults                              |
| Becker 2019         | [109] | SENIAM*                          | na   | na  | 2  | signal processing     | healthy adults and patients with spasticity |
| Donges 2019         | [142] | Figure provided                  | na   | na  | na | clinics               | patients with cervical spinal cord injury   |
| Laßek 2019          | [123] | one third from the cubital fossa | na   | na  | 20 | physiology/diagnostic | healthy adults and patients with spasticity |
| Myers 2019          | [76]  | over muscle belly                | 10x2 | 10  | 10 | physiology            | healthy adults                              |
| Myers 2019          | [77]  | over muscle belly                | 10x3 | 10  | 10 | physiology            | healthy adults                              |
| Suplino 2019        | [88]  | na                               | na   | na  | na | modeling/exoskeletons | healthy adults                              |
| Chaytor 2020        | [72]  | over muscle belly                | na   | na  | 20 | sport                 | healthy adults                              |
| Hsin-Chien Lee 2020 | [96]  | na                               | na   | na  | na | clinics               | patients with stroke                        |
| Lv 2020             | [103] | na                               | 10x1 | 10  | na | signal processing     | healthy adults                              |
| Pratt 2020          | [43]  | over muscle belly                | 12   | 113 | 17 | sport                 | healthy adults                              |
| Watanabe 2021       | [39]  | over muscle belly                | na   | na  | 22 | ergonomy              | healthy adults                              |

\* SENIAM cited, while SENIAM does not provide any reference for BRD; na = not available

**Supplementary Table S2** –List of the retrieved studies using high-density EMG.

| Author, year | Ref. | Electrode placement                                                                                                                                  | High-density EMG                | Electrode size | Inter-electrode distance | Crosstalk assessed | Crosstalk mentioned | Application | Subjects       |
|--------------|------|------------------------------------------------------------------------------------------------------------------------------------------------------|---------------------------------|----------------|--------------------------|--------------------|---------------------|-------------|----------------|
| Lowery 2002  | [18] | Bars placed such that the long axis of each electrode bar was perpendicular to the muscle fiber direction                                            | Four parallel electrode bars    | 10x1 mm        | 8 mm                     |                    |                     | Physiology  | Healthy adults |
| Lowery 2003  | [19] | Bars placed parallel to the fiber direction, and away from the innervation zone of the muscle                                                        | Four parallel electrode bars    | 10x1 mm        | 8 mm                     |                    | yes                 | Physiology  | Healthy adults |
| Gazzoni 2014 | [9]  | Stretchable sleeve with the columns of electrodes placed around the forearm circumference such as the first column was in correspondence of the ulna | Grid of 112 circular electrodes | 6 mm diameter  | 15 mm                    |                    | yes                 | Physiology  | Healthy adults |
| Jafari 2014  | [20] | Either proximally or distally from the main IZ location                                                                                              | Linear array of 8 electrodes    | na             | 5 mm                     |                    |                     | Physiology  | Healthy adults |
| Boccia 2015  | [21] | Selected by visual inspection of the sEMG signals                                                                                                    | Linear array of 8 electrodes    | 5x1 mm         | 5 mm                     |                    |                     | Sport       | Healthy adults |
| Hajian 2019  | [22] | The fourth electrode of the array was placed at one-third the length of the forearm measured from the elbow                                          | Linear array of 8 electrodes    | na             | 5 mm                     |                    |                     | Physiology  | Healthy adults |

na = not available
